# Supplementary material for: Optimizing the performance of Auy/Nix/TiO2NTs photoanodes for photoelectrochemical water splitting
Source: Royal Society of Chemistry journal article supplement (doi:10.1039/d3ra02011h), 2023-01-01
Supplement: d3ra02011h1.pdf [file d3ra02011h1.pdf]

## Supporting Information

### Optimizing the Performance of Au<sub>y</sub>/Ni<sub>x</sub>/TiO<sub>2</sub>NTs Photoanodes for Photoelectrochemical Water Splitting

Shaimaa K. Mohamed<sup>1,\*</sup>, Amany M. A. Bashat<sup>1</sup>, Hassan M.A. Hassan<sup>1,\*</sup>, Nahla Ismail<sup>2</sup>,

Waleed M. A. El Rouby<sup>3,\*</sup>

<sup>1</sup> *Department of Chemistry, Faculty of Science, Suez University, 43518, Suez, Egypt*

<sup>2</sup> *Physical Chemistry Department, Centre of Excellence for Advanced Sciences, Renewable Energy Group, National Research Centre, 12311, Dokki, Giza, Egypt.*

<sup>3</sup> *Materials Science and Nanotechnology Department, Faculty of Postgraduate Studies for Advanced Science (PSAS), Beni-Suef University, 62511 Beni-Suef, Egypt*

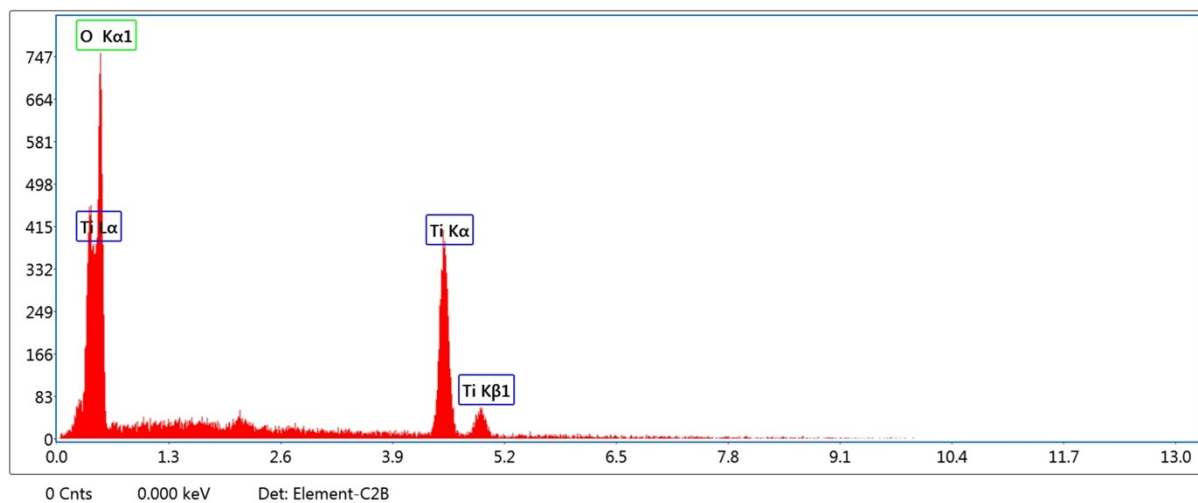

**Fig. S1:** The EDS elemental analysis of TiO<sub>2</sub>NTs.

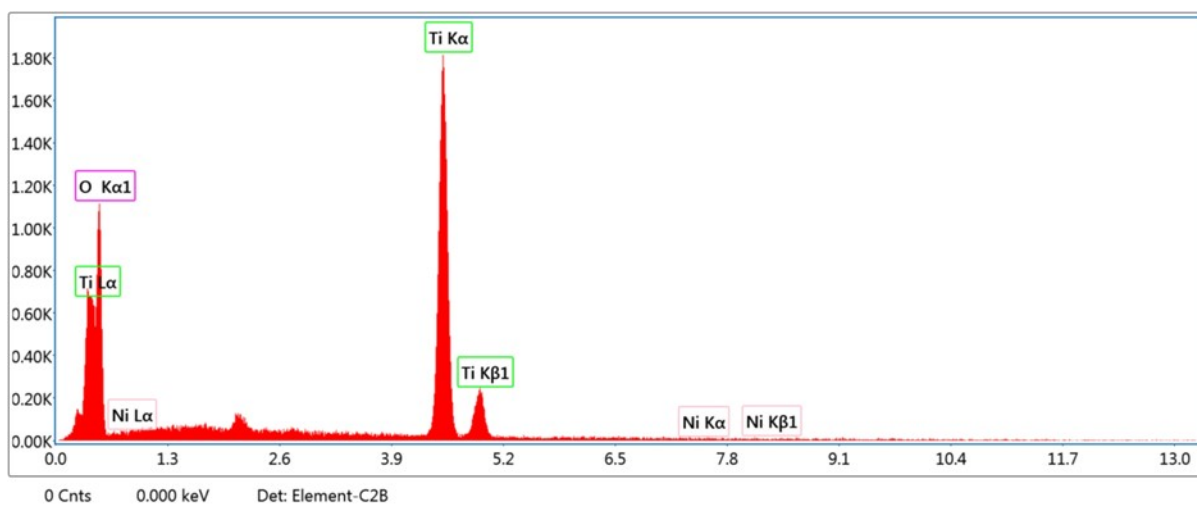

**Fig. S2:** The EDS elemental analysis of Ni<sub>3</sub>/TiO<sub>2</sub>NTs.

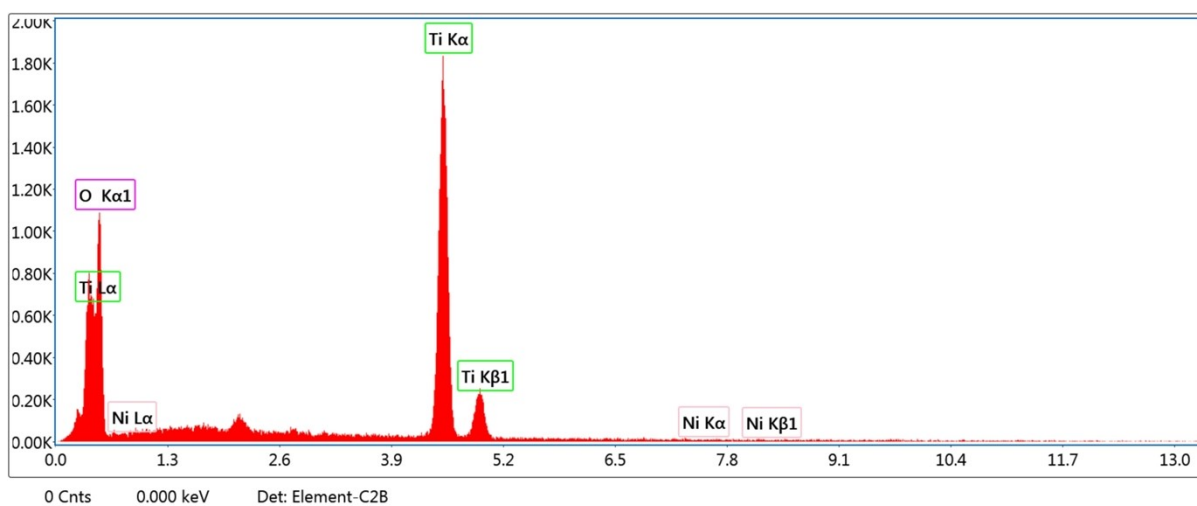

**Fig. S3:** The EDS elemental analysis of Ni<sub>5</sub>/TiO<sub>2</sub>NTs.

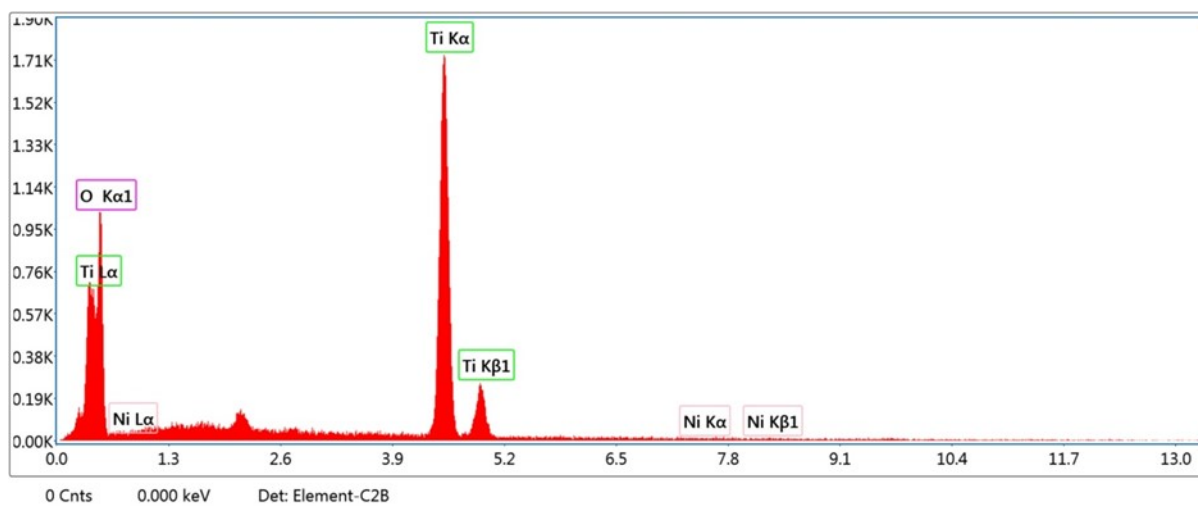

**Fig. S4:** The EDS elemental analysis of  $\text{Ni}_{10}/\text{TiO}_2\text{NTs}$ .

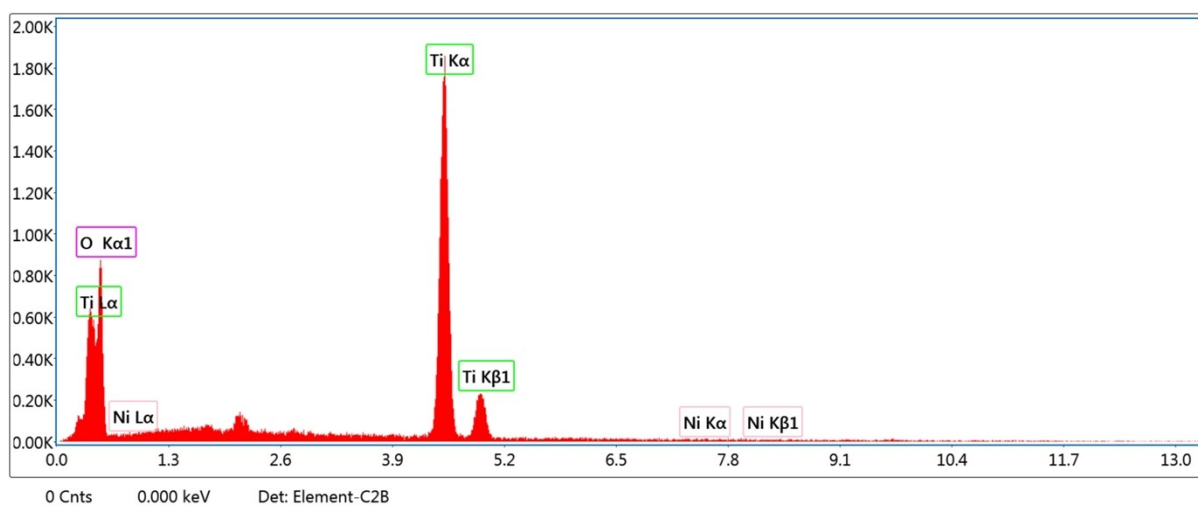

**Fig. S5:** The EDS elemental analysis of  $\text{Ni}_{20}/\text{TiO}_2\text{NTs}$ .

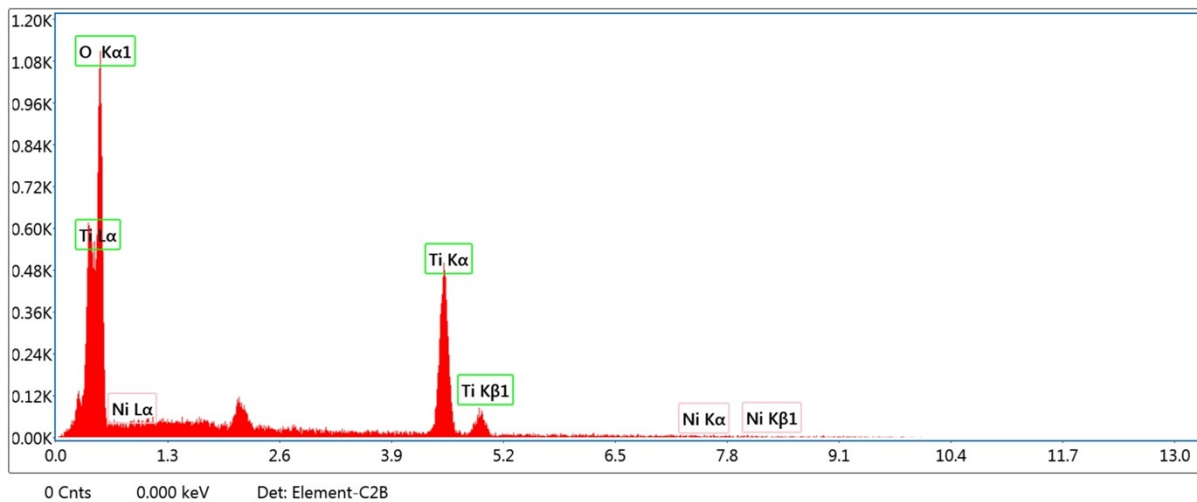

**Fig. S6:** The EDS elemental analysis of  $\text{Ni}_{30}/\text{TiO}_2\text{NTs}$ .

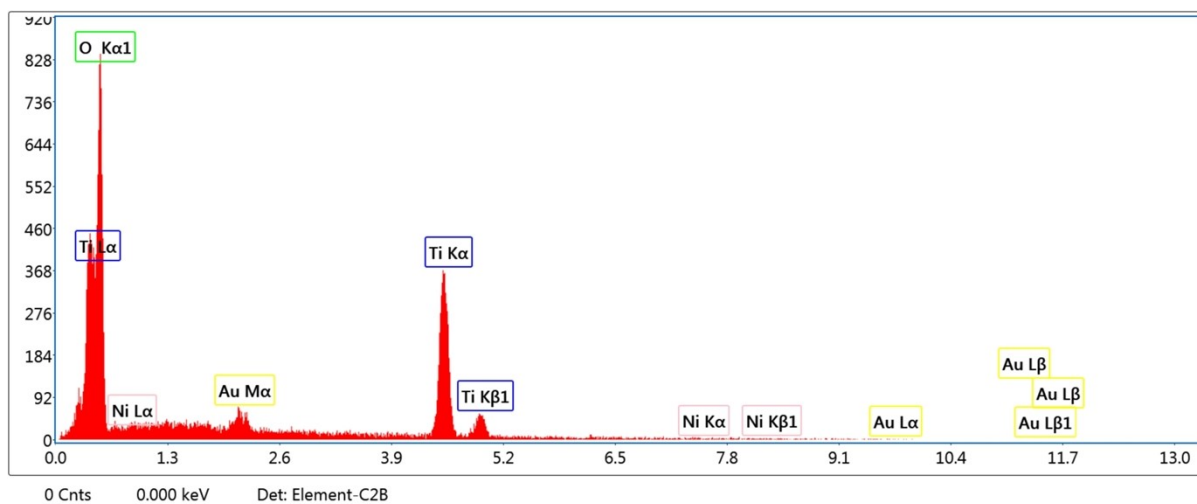

**Fig. S7:** The EDS elemental analysis of  $\text{Au}_{15}/\text{Ni}_{20}/\text{TiO}_2\text{NTs}$ .

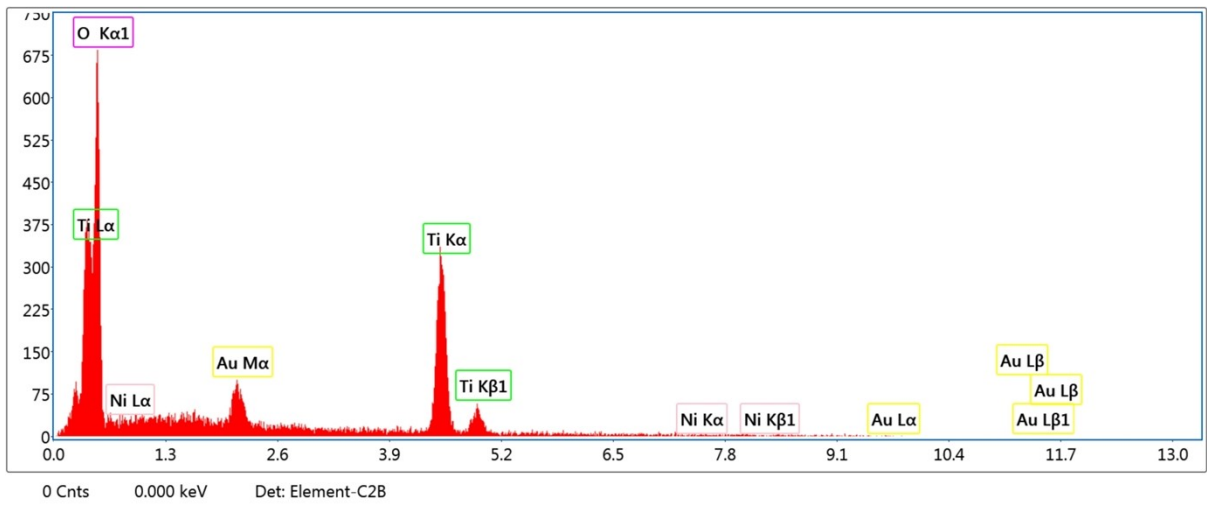

**Fig. S8:** The EDS elemental analysis of Au<sub>30</sub>/Ni<sub>20</sub>/TiO<sub>2</sub>NTs.

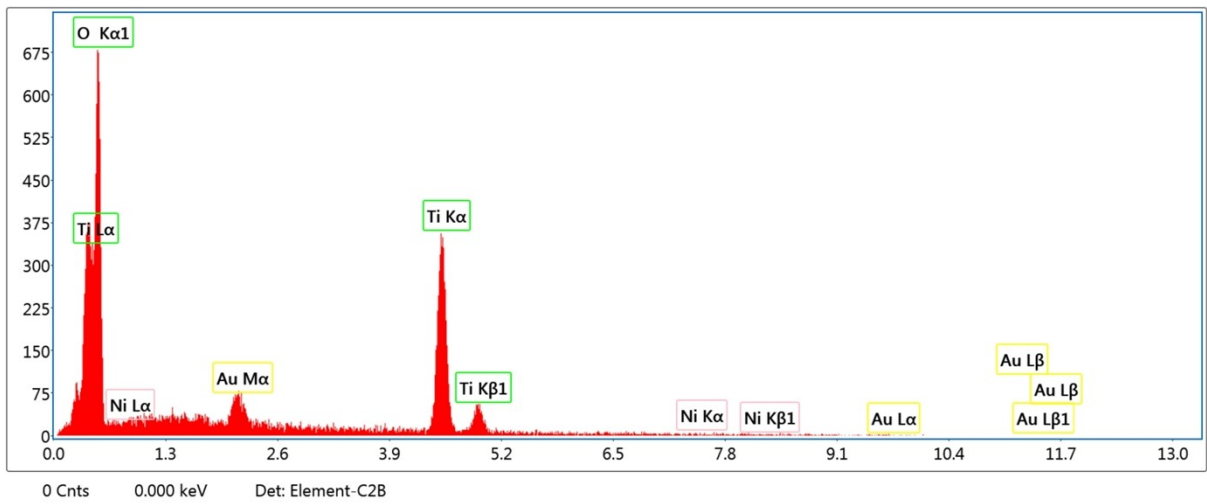

**Fig. S9:** The EDS elemental analysis of Au<sub>60</sub>/Ni<sub>20</sub>/TiO<sub>2</sub>NTs.

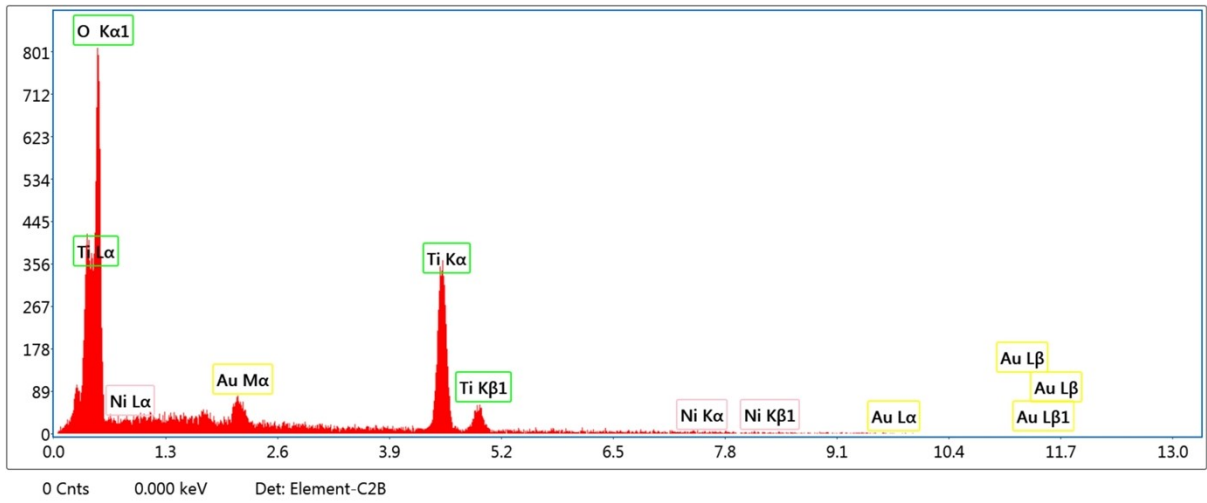

**Fig. S10:** The EDS elemental analysis of Au<sub>30</sub>/Ni<sub>20</sub>/TiO<sub>2</sub>NTs.
